# Supplementary material for: A ratiometric fluorescent probe for sensing sulfite based on a pyrido[1,2-a]benzimidazole fluorophore
Source: Royal Society of Chemistry journal article supplement (doi:10.1039/c7nj02086d), 2017-01-01
Supplement: c7nj02086d1.pdf [file c7nj02086d1.pdf]

**New Journal of Chemistry**

**Supplementary data**

**A ratiometric fluorescent probe for sensing sulfite based on  
pyrido[1,2-a]benzimidazole fluorophore**

Aikun Liu, Ruixue Ji, Shili Shen, Xiaoqun Cao, Yanqing Ge\*

*School of Chemistry and Pharmaceutical Engineering, Taishan Medical  
University, Taian, Shandong 271016, P. R. China*

**Corresponding Author:** Yanqing Ge

E-mail address: geyanqing2016@126.com

Tel.: +86-538-6229741; Fax: +86-538-6229741

## Table of Content:

|                                                                                                                              |           |
|------------------------------------------------------------------------------------------------------------------------------|-----------|
| <b>Fig. S1</b> The fluorescence intensity of <b>PBI</b> with and without sulfite in the different solution.                  | <b>S3</b> |
| <b>Fig. S2</b> Linearity of fluorescence ratio ( $I_{442}/I_{507}$ ) with sulfite concentration from 0 to 18 $\mu\text{M}$ . | <b>S3</b> |
| <b>Fig. S3</b> HRMS spectrum of <b>PBI</b> .                                                                                 | <b>S4</b> |
| <b>Fig. S4</b> HRMS spectrum of the crude product of <b>PBI</b> with sodium sulfite.                                         | <b>S4</b> |
| <b>Fig. S5</b> $^1\text{H}$ NMR spectrum of compound <b>2</b> .                                                              | <b>S5</b> |
| <b>Fig. S6</b> $^1\text{H}$ NMR spectrum of probe <b>PBI</b> .                                                               | <b>S5</b> |
| <b>Fig. S7</b> $^{13}\text{C}$ NMR spectrum of probe <b>PBI</b> .                                                            | <b>S6</b> |
| <b>Fig. S8</b> $^1\text{H}$ NMR spectrum of probe <b>PBI</b> with sodium sulfite in DMSO.                                    | <b>S6</b> |
| <b>Fig. S9</b> $^1\text{H}$ NMR spectrum of probe <b>PBI</b> with sodium sulfite in DMSO and $\text{D}_2\text{O}$ .          | <b>S7</b> |

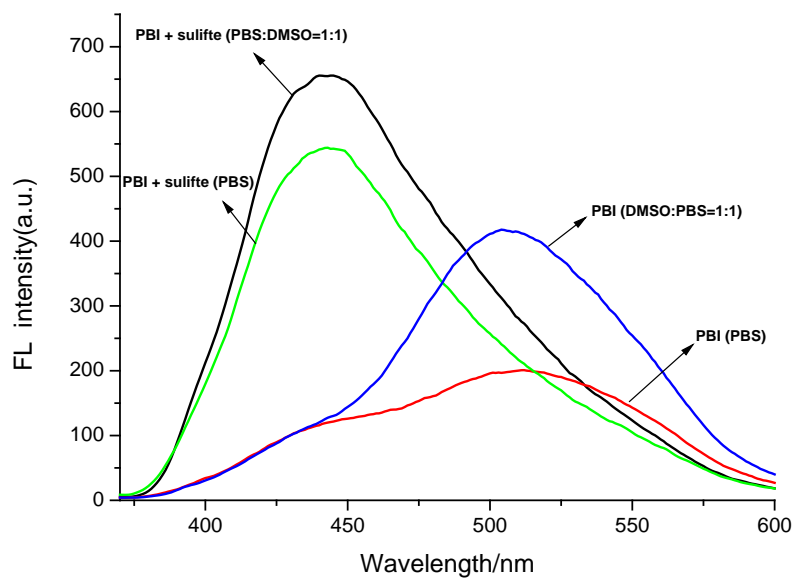

**Fig. S1** The fluorescence intensity of **PBI** with and without sulfite in the different solution.

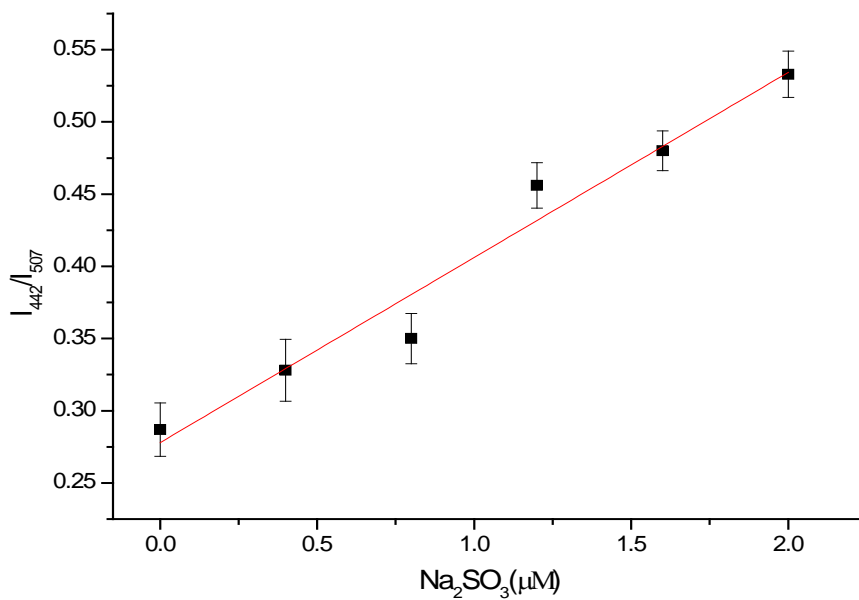

**Fig. S2** Linearity of fluorescence ratio ( $I_{442}/I_{507}$ ) with sulfite concentration from 0 to 2  $\mu\text{M}$ .

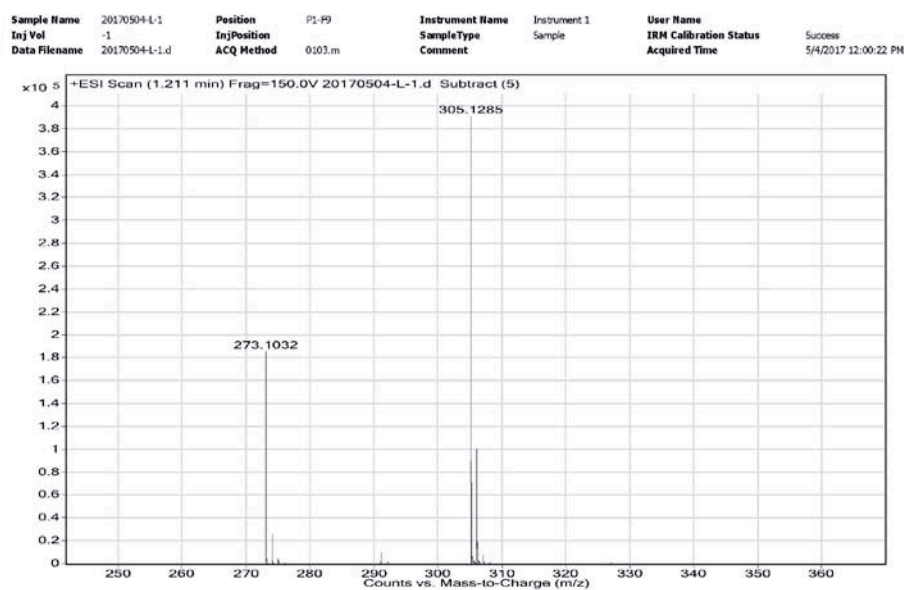

**Fig. S3** HRMS spectrum of **PBI**.

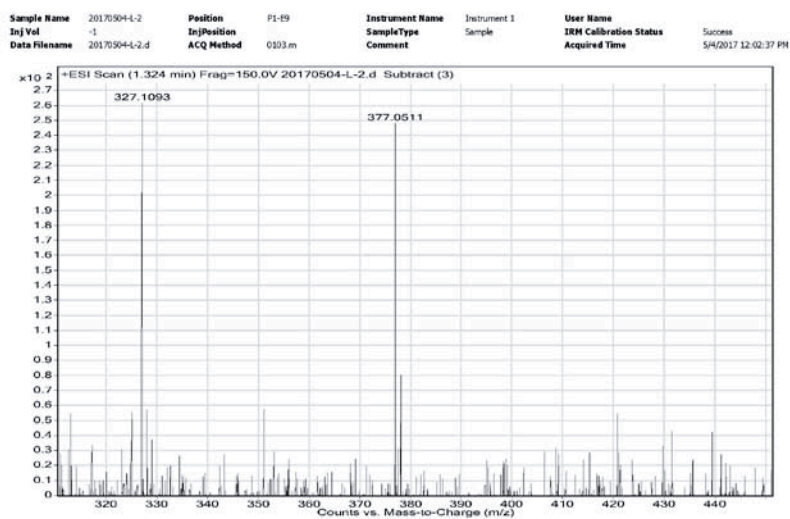

**Fig. S4** HRMS spectrum of the crude product of **PBI** with sodium sulfite.





1H-TSXX-6-1-3aBS03-2-170728  
STANDARD PROTON PARAMETERS

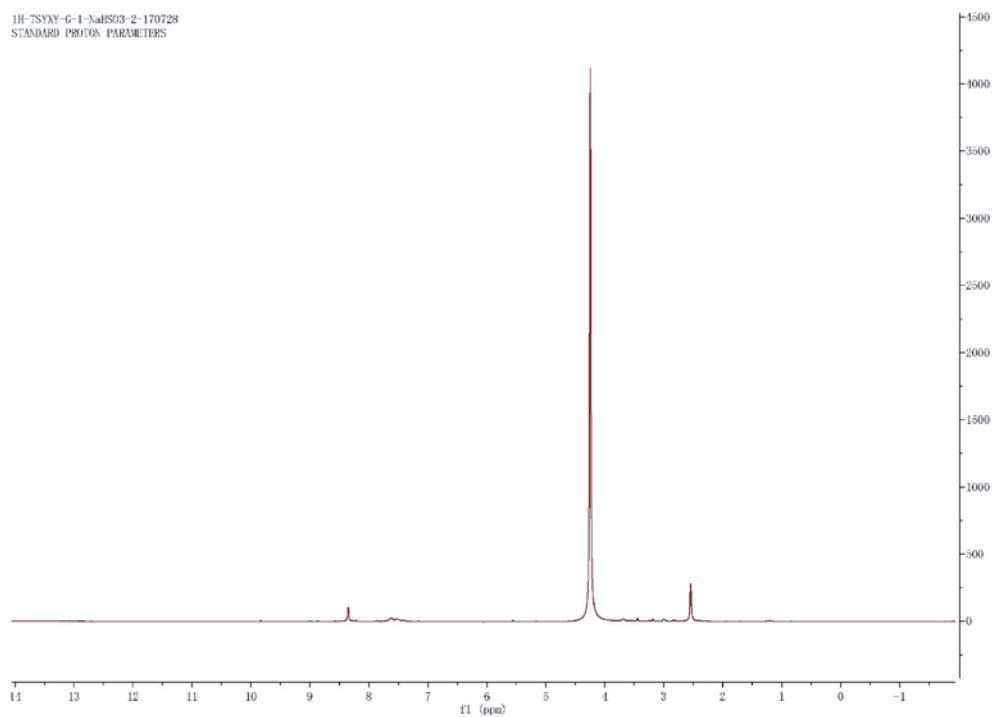

**Fig. S9**  $^1\text{H}$  NMR spectrum of probe **PBI** with sodium sulfite in DMSO and  $\text{D}_2\text{O}$ .
